# Supplementary material
Source: PubMed Central journal article supplement (PMC2940493)
Supplement: en.2010-0137_1.pdf [file en.2010-0137_1.pdf]

**Supplemental Table 1.** Affymetrix (Rat Genome Array) expression profiling comparing un-induced cells to cells expressing active fragment of human OASIS for 48 h. Common genes induced in three independent experiments greater than 2-fold are shown. \* genes induced in 2 of 3 experiments

| Gene ID | Fold Change (Mean) | Description/ Putative Function                        |
|---------|--------------------|-------------------------------------------------------|
| 294103  | 41.42              | Papss2, sulfate conjugation                           |
| 25107   | 40.04*             | Avrp1A, inositol-calcium signaling                    |
| 360959  | 14.86              | HtrA3, inhibitor of TGF- $\beta$ signaling, Apoptosis |
| 312607  | 12.27              | Pdzrf3, ubiquitin protein ligase activity             |
| 287877  | 8.21               | P5cr1, arginine and proline metabolism                |
| 294048  | 7.76               | Pi3kap, signaling                                     |
| 171041  | 6.49*              | Kns2, Kinesin 2                                       |
| 360611  | 5.88               | Cop $\zeta$ 2, protein transport                      |
| 498609  | 5.68               | Lpar2, signal transduction                            |
| 297894  | 5.56*              | Matn1, cartilage matrix protein                       |
| 29241   | 5.304*             | Adcy8, adenylyl cyclase 8                             |
| 79247   | 5.082*             | Htr5b, serotonin receptor                             |
| 315131  | 4.89               | KDEL Erd3, protein transport                          |
| 25027   | 4.75               | Slc16a1, transporter                                  |
| 282712  | 3.78               | Slc6a15, transporter                                  |
| 690050  | 3.55               | Tpmt, thiopurine methylation                          |
| 304322  | 3.45*              | Chst12, Carbohydrate sulfotransferase                 |
| 316842  | 3.27*              | Metrn1, glial cell differentiation                    |
| 64313   | 3.2                | Oat, proline metabolism                               |
| 29643   | 3.25               | Sv2c, protein secretion/transport                     |
| 171044  | 2.7*               | Sstr3, neurotransmitter                               |
| 64157   | 2.64               | Ddah1, transcriptional regulation                     |
| 308836  | 2.61               | Kctd14, ubiquitination                                |
| 291444  | 2.54*              | Prrc1, proline-rich coiled-coil 1                     |
| 406166  | 2.47               | Agpat1, biosynthesis of glycerolipids                 |
| 306344  | 2.46               | Arrdc2, adrenergic receptor signaling                 |
| 680493  | 2.43               | Cd3 $\epsilon$ ap, Notch signaling                    |
| 114519  | 2.4                | Nfil3, transcription factor                           |
| 362204  | 2.3                | Casc4, cancer                                         |
| 300211  | 2.23               | Fkbp11, protein folding                               |
| 83425   | 2.36               | Prka, adrenergic receptor signaling                   |
| 362368  | 2.35*              | Ggct, gamma-glutamyl cyclotransferase                 |
| 24561   | 2.33*              | Mpg, N-methylpurine-DNA glycosylase                   |
| 314879  | 2.16               | Xpot, nuclear receptor for tRNAs                      |
| 64475   | 2.13               | P4ha1, proline metabolism                             |
