# Supplementary material
Source: PubMed Central journal article supplement (PMC2940493)
Supplement: en.2010-0137_2.pdf [file en.2010-0137_2.pdf]

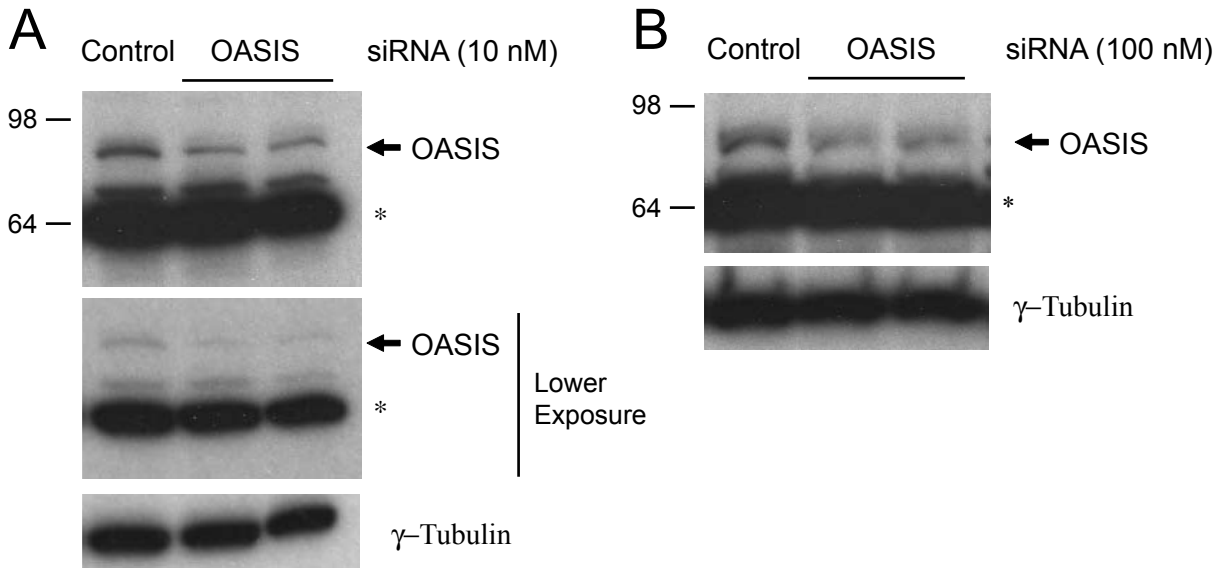

**Supplemental Fig. 1.** INS-1 831/13 cells were transfected with control (GFP) and OASIS siRNAs at 10 nM (A) or 100 nM (B) using Lipofectamine RNAiMax reagent (Invitrogen). The OASIS siRNA experiments were performed in duplicate. After 72h the cells were lysed in 1% TX-100 lysis buffer (A) or directly in sample buffer (B). 10  $\mu$ g of protein (A) or 30  $\mu$ l cell lysate (B) was resolved using 10% SDS-PAGE and immunoblotted for OASIS and  $\gamma$ -tubulin. Note the reduction in the top band migrating at the expected MW for OASIS in the OASIS siRNA transfected cells. The prominent band at 64 kDa is indicated with an asterisk and does not appear to be sensitive to the siRNA treatment. In (A) two different exposures of the anti-OASIS western blot are shown. Only the top OASIS band is sensitive to the siRNA. The siRNA to OASIS was obtained from Invitrogen (GAGAAAUGACUCAGCUGCCAGUGAU) and to GFP as reported previously (Zhang, L. & Volchuk, A. 2010. FEBS Letters. 584:2298)

>gi|53850649|ref|NM\_001005562.1| Rattus norvegicus cAMP responsive element binding protein 3-like 1 (Creb3l1), gene-2672 bases

CAGAAGCTGCGCGGAGGAAGAGACCTAGAGAGATCTCTGCGACTCGGCAGCCACCCATCCTCGGGGGAGC  
ATTGAGCTCCCCACCCCGGCTCCCACCCGGCCCCGGGGGGCTCCTCCAGCATCGGCCCCACCCCGGGC  
TCCCCATGGAAGCCAGCTGCGCCCCGGGAGGAGCAGGAGGAGGAGTTCGGCTGAAAGCCCACGGTGCTTTC  
GGCGCCGCTGCCCTAAGGCCCCCAGCGCCCCGACCCGCGCCACCCACCGCTCCTCCCCCGGGCTC  
GCCGGGACCTGCCCCGGGCGCCTGCCCGCGCCCAGCCGCAGCCTGGTGCGGGGATCCTCGCCGCCCTG  
GAGTGAGGGAAGCGCAGCCCCGAAGGGGTCCCCTGGAACCCGGCGCGATGGACGCCGTCTTGGAACTTTTC  
CCGGCCGACAGGCTGTTCCCGGGATCCAGCTTCCCTGGACTTGGGAGACCTGAATGAGTCGGATTTCTCTCA  
ACAATGCGCACTTCCCGGAGCACCTGGACCCTTTGTGGAGAACATGGAGGACTTCTCCAATGACCTGTT  
CAGCAGCTTCTTTGATGACCCTGTGCTGGATGAGAAGAGCCCTCTGCTGGACATGGAACCTGGATTCCCCT  
GCTCCAGGCATCCAGGCTGAGCACAGCTACTCCCTGAGTGGGGATTCTGCACCCAGAGCCCCCTTGTGC  
CTGTCAAATGGAGGATACACCCCAAGATATGGAACACGGAGCATGGGCACTGGGAAACAAACTGTGCTC  
CATTATGGTGAAGCAGGAGCAGAGCCCGAGCTTCCGGTTGACCCCTGGCTGCCTCCTCCGCCATGGCT  
GCTGCTACCATGGCCACCCACCACTGCTGGGCCTCAGCCCCATCTCCAGGCTGCCCATCCCTCACCAGG  
CCCCAGGAGAAATGACTCAGCTGCCAGTGATCAAAGCAGAGCCCCCGAAATGAGCCAGTTTCTCAAAGT  
GACACAAGAGGACCTCGTACAGATGCCTCCAACACCCCCAGCAGCCATGGCAGTGACAGTGACGGCTCC  
CAGAGTCCCCGCTCTCTTCCCCCTCCAGCCCTGTCCGGCCCATGGCCCGCTCCTCCACGGCCATTTCCA  
CCTCTCCGCTCCTCACTGCCCTCACAACTGCAGGGGACATCAGGGCCACTGCTCTTGACAGAAGAGGA  
GAAGCGAACTTTGATCGCCGAGGGTTATCCCATCCCCACAACTCCCCCTCACCAGGCTGAGGAGAAG  
GCCCTGAAGAGAGTGCAGGAAAATTAAGAACAAGATCTCTGCCAGGAGAGCCGCCGCAAAAAGAAGG  
AGTATGTGGAGTGTCTAGAGAAGAAGGTGGAGACATATACATCAGAGAACAATGAACTGTGGAAGAAGGT  
GGAAACCCTAGAGACTGCCAACAGGACCCTGCTCCAGCAGCTGCAGAACTCCAGACTCTGGTCACCAGC  
AAGATCTCCAGACCTTACAAGATGGCGGCCACACAGACTGGCACTTGCTCATGGTGGCAGCCTTGTGCT  
TTGTTCTGGTGCTGGGCTCACTTGCGCCCTGCCTTCCCTGCATTCTCTTCTGGCTCAAAGACTGTGAAAGA  
AGACCCCGTTCGAGCTGACAGTGTCTACGCAGCCAGTCAGATGCCTTCCCGAAGCCTGCTGTTTTATGAT  
GATGGGGCAGGCTCCTGGGAAGATGGCCACCGAGGTGCTCTACTGCCTGTGGAGCCCCCAGAAGGCTGGG  
AGCTCAAACCCGGGGGACCAGCAGAGCCGAGGCCCCAGGACCACCTCCGACATGACCATGCGGACAGCAT  
CCACGAGACAACCAAGTACTTGAGAGAGACCTGGCCAGAGGATAACCGAGGACAATGGCGCCAGCCCCAAT  
TTCTCCCACCCCAAGGAGTGGTTCCACGACAGGGATCTGGGCCCCAACACCACCATCAAATCTCCTAGG  
CAGATCCAGCTCACACCCCTGCCCTGGGGCCCTCTGCCCCAGGAGAAAGGGTCTTTCTTCTCCCCAGCCC  
TCCAGCTTCTGTAGTGCCTGGGGTCCCTCTATGTCCCCGGACACTTGGACTGCTCCCCTGGGCCGACCA  
CTCTGTTCCCACTTTTTCTCCACAACATATC

miR-140 (259)

TTTTCTTTC

miR-140 (306)

GCACACACAAACACACACCCCCACTTCTACTGTACAGAGACCAAGAACAGAAATCGTTTGTAAATAATG  
AACCTTATTTTTTATTATTGCGACCCCTAAGATATTGTATTTTACAAATCTCCCTCCCGTCACCTCTC  
CCTTATTTTGTATTTTATGAAGTTAGTGCGGGCTTTGCTACCCCTTGGCCTGGGACAGAGGGACACCCCA  
CCCTCACCAGGCCTCCCCGTGCCGCTGCCAAGCTGCTGGGCCTTTTTAACTGCTCCTCCACCAGCTCAG  
CACACGCTTTAAGAAAGCAAAATTAATAAAAAAAAAAAAAAAAAAAGATTTCAGCATCAAAAAAAAAAAAAAAAAA  
AAAAAAAAAAAAA

Yellow: cDNA (ATG-TAG); Underline: 3' UTR of CREB3L1 gene,  
Green: rno-miR-140 micro RNA target binding region.  
Pink: rno-miR-140 micro RNA "Seed" regions (7mer-m8) at 259 and 306  
base position of 3' UTR

### Supplemental Fig. 2. Analysis of potential micro RNA target sites in the OASIS mRNA

MicroRNA target analysis for the OASIS gene was performed with Targetscan ([www.targetscan.org](http://www.targetscan.org)), miRanda/ MiRBase (<http://microrna.sanger.ac.uk>) and MiRtarget2 (<http://>

mirdb.org) programs. MicroRNAs (miRNAs) are short (21–23 nucleotides) noncoding RNA molecules that can regulate the expression of protein-coding genes. All three programs predicted that the rat microRNA, rno-miR-140 has target sites in the 3'UTR of rat OASIS mRNA. The “seed sequence” refers to the conserved 6–8mer region of the microRNA. The microRNA, rno-miR-140 (7mer-8) target seed site is detected in the 3'UTR. The seed sequence present in the 3' UTR is conserved between human, mouse and rat OASIS. By the Targetscan program the probability of conserved targeting ( $P_{CT}$ ) at 0.42 is statistically significant, indicating that the conserved site is likely a miRNA target site. The seed match of 7mer-8 refers to an exact match to positions 2-8 of the mature miRNA (the seed + position 8) (Friedman et al., 2009)

Friedman RC, Farh KK, Burge CB, Bartel DP. Most mammalian mRNAs are conserved targets of microRNAs. *Genome Res.* 2009; 19(1):92-105.
